# Supplementary material for: Impact of Rapid Molecular Screening at Hospital Admission on Nosocomial Transmission of Methicillin-Resistant Staphylococcus aureus: Cluster Randomised Trial
Source: PubMed Central journal article supplement (PMC4023928; doi:10.1371/journal.pone.0096310), 2014-05-16

ROUTE DE LENNIK 808 - B-1070 BRUXELLES

Brussels, the September 16, 2008

COMITE D'ETHIQUE  
Agrégation: N°OM021

Pr. Marc STRUELENS  
Department of Bacteriology & Virology  
CUB Hôpital Erasme  
Route de Lennik 808  
B-1070 Bruxelles

Secrétariat: Tél.: 32 2.555.37.07  
Fax: 32 2.555.40.20  
E-mail: ethique.hopitalerasme@ulb.ac.be

Dear Pr. STRUELENS,

Please find further on the answer of the Ethics Committee concerning the below mentioned study.

**ETHICS COMMITTEE APPROVAL**

We, undersigned,  
Chairman & Secretary of

Pr. A. HERCHUELZ & Mr. G. NISSET  
Ethics Committee Erasme Hospital  
808, route de Lennik  
B-1070 Brussels, Belgium  
N° of agreement by "Ordre des Médecins": OM021

confirm that the documents submitted for approval were initially examined during the meeting held on 19/08/2008 (dd/mm/yyyy).

After collecting the opinion of the non-leading ethics committees and after examination of the answers to the comments and of the new version of the information sheet and consent form received the 15/09/2008, the Ethics Committee gave its agreement on 16/09/2008 to the following documents:

- Protocol (Our Ref.: P2008/201) entitled: *"Two-center intervention study to evaluate the impact of rapid molecular screening on nosocomial transmission of Methicillin-resistant Staphylococcus aureus (MRSA)."* (Version Final protocol V8, dated July 30, 2008)
- French Patient Information Sheet: Version 2
- Dutch Patient Information Sheet: Version 2
- Investigator's Curriculum Vitae
- Ethics Committees Application form signed the 7/31/2008
- Table "Data to be collected"

The list of the names and qualifications of the members of the Ethics Committee present at the meeting and the list of the Ethics Committees concerned (in case of multi-centre study) are added in appendix.

The Committee stresses that it is the responsibility of the promoter to guarantee the conformity of Patient Information sheet in French and Dutch. We consider also the promoter's responsibility to provide to all the peripherals ethics committees the final French and Dutch versions of the patient information sheet (adapted, if needed with the name of the local investigator, the name of the institution,...) approved in the present letter.

We hereby confirm that this Ethics Committee is organized and operates according to ICH GCP and the applicable law and regulations.

  
Mr. G. NISSET  
Secretary

Pr. A. HERCHUELZ  
Chairman

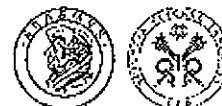

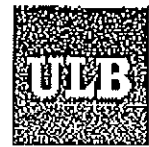

ROUTE DE LENNIK 808 - B-1070 BRUXELLES

COMITE D'ETHIQUE  
Agrégation: N°OM021

## List of Members present at the meeting of 19/08/2008 (dd/mm/yyyy)

Secrétariat: Tél.: 32.2.555.37.07  
Fax: 32.2.555.48.20  
E-mail: comite.ethique@erasme.ulb.ac.be

**Président :**

Pr. A. Herchuelz

**Vice-Présidents :**

Pr. S. Goldman

Dr. M. Remmelink

**Secrétaire :**

Mr. G. Niset

**Membres :**

Dr. X. CATTEAU

Dr. E. DEMANET

Dr. P. DEMETTER

Dr. S. DE BREUCKER

Mr. P. FISCHBACH

Me. B. FONTEYN

Me. P.-A. FORIERS

Mme. N. GAMMAR

Dr. S. GOLDMAN

Dr. A. HERCHUELZ

Dr. H. LOUIS

Dr. M. MANTO

Dr. J. MARIN

Dr. F. MASCART

Mr. M. MAYER

Mme. A. NELIS

Mr. G. NISSET

Mme. A. OCMANT

Dr. M. REMMELINK

Dr. J. ROUBY

Mme. C. SAUVAGE

Dr. P. THIBAUT

Dr. J.-L. VACHIERY

Dr. C. VERBEURGT

■ = present

□ = absent

E = Absent but excused

- Dr. X. CATTEAU, Pathologist, Medical Doctor, Male
- Dr. E. DEMANET, General Practitioner, Medical Doctor, Male
- E Dr. P. DEMETTER, Pathologist, Medical Doctor, Male
- E Dr. S. DE BREUCKER, Geriatriist, Medical Doctor, Female
- Mr. P. FISCHBACH, Psychologist, Male
- E Me. B. FONTEYN, Lawyer, Male
- Me. P.-A. FORIERS, Lawyer, Male
- Mme. N. GAMMAR, Assistant Nursing Director, Nurse, Female
- E Pr. S. GOLDMAN, Neurologist, Medical Doctor, Male
- Pr. A. HERCHUELZ, Pharmacologist, Medical Doctor, Male
- E Dr. H. LOUIS, Gastroenterologist, Medical Doctor, Male
- E Dr. M. MANTO, Neurologist, Medical Doctor, Male
- E Dr. J. MARIN, General Practitioner, Medical Doctor, Male
- Pr. F. MASCART, Immunobiologist, Medical Doctor, Female
- Mr. M. MAYER, Lay member, Moral Counsel, Male
- E Mme. A. NELIS, Assistant Nursing Director, Nurse, Female
- Mr. G. NISSET, Ethics Committee Secretary, Male
- Mme. A. OCMANT, Pharmacist, Female
- Dr. M. REMMELINK, Pathologist, Medical Doctor, Female
- Dr. J. ROUBY, General Practitioner, Medical Doctor, Male
- E Mme. C. SAUVAGE, Physiotherapist, Female
- E Dr. P. THIBAUT, General Practitioner, Medical Doctor, Male
- Dr. J.-L. VACHIERY, Cardiologist, Medical Doctor, Male
- Dr. C. VERBEURGT, Medical Doctor, Male

Edited August 19, 2008

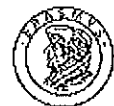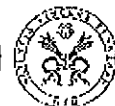

Supplement: pone.0096310.s003.pdf [file pone.0096310.s003.pdf]
